# Supplementary material for: Contributions of MyD88-dependent receptors and CD11c-positive cells to corneal epithelial barrier function against Pseudomonas aeruginosa
Source: PubMed Central journal article supplement (PMC5653778; doi:10.1038/s41598-017-14243-w), 2017-10-23
Supplement: 41598_2017_14243_MOESM1_ESM.pdf [file 41598_2017_14243_MOESM1_ESM.pdf]

# Contributions of MyD88-dependent receptors and CD11c-positive cells to corneal epithelial barrier function against *Pseudomonas aeruginosa*

Matteo M.E. Metruccio, Connie Tam, David J. Evans, Anna L. Xie, Michael E. Stern, and Suzanne M.J. Fleiszig

## Supplementary Figure 1

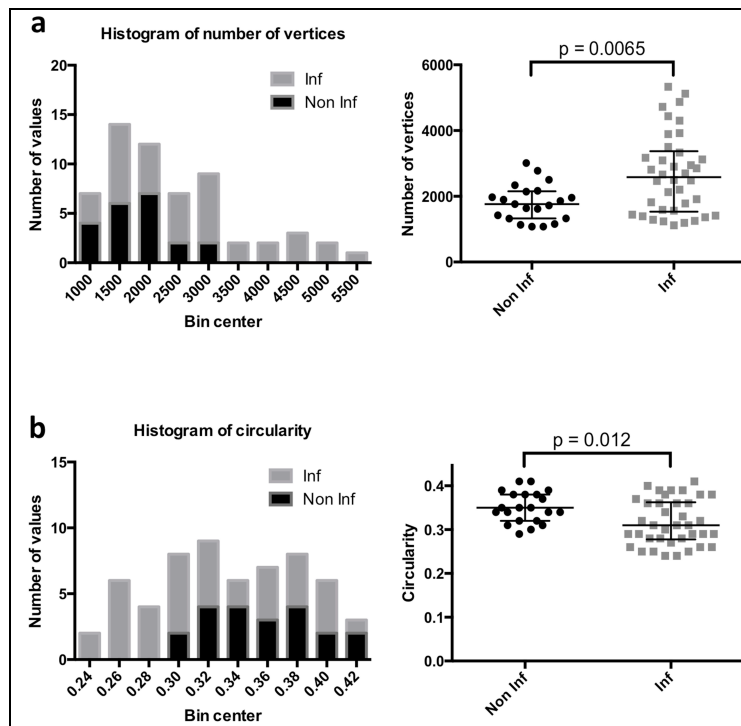

Fig. S1 Analysis of the distribution of CD11c<sup>+</sup> cell shape changes in murine corneas before and after 4 h challenge with *P. aeruginosa* PAO1 *in vivo*. Control eyes were inoculated with PBS. (A) Distribution of the number of vertices per CD11c<sup>+</sup> cell (range 1078 to 5334) (left). Median and interquartile ranges with points representing individual CD11c<sup>+</sup> cells (right). (B) Distribution of CD11c<sup>+</sup> cell circularity (range 0.24 to 0.41) (left). Median and interquartile ranges with points representing individual CD11c<sup>+</sup> cells (right). P values were determined using the Mann-Whitney U test.

## Supplementary Figure 2

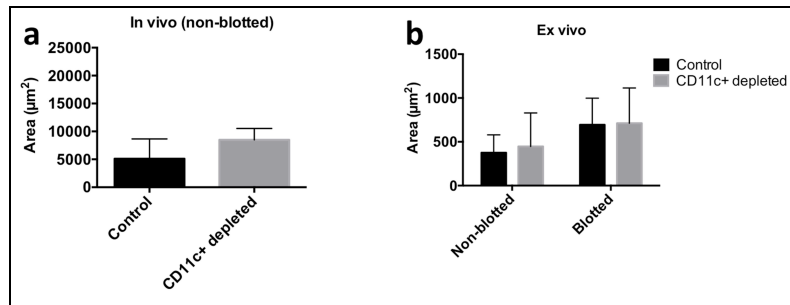

Fig. S2 (a) CD11c<sup>+</sup> cell depletion did not affect *P. aeruginosa* PAO1 adhesion to healthy (non-blotted) murine corneas *in vivo* after 4 h exposure to bacteria. (b) CD11c<sup>+</sup> cell depletion did not affect *P. aeruginosa* adhesion to healthy (non-blotted) or superficially-injured (blotted) corneas if experiments were performed *ex vivo* with 6 h exposure to bacteria.
